# Supplementary material for: Integrative taxonomic reassessment of Odontophrynus populations in Argentina and phylogenetic relationships within Odontophrynidae (Anura)
Source: PeerJ. 2019 Feb 25;7:e6480. doi: 10.7717/peerj.6480 (PMC6394351; doi:10.7717/peerj.6480)
Supplement: Supplemental Information 5 [file peerj-07-6480-s005.xlsx]

## Sheet: Tabelle1
Species	locality	sex	Cllection number	SVL	headWmax	headL	snout_eye	internose	intereye	nose_eye	snout_nose	eye_diameter	arm	femur	tibia	foot	finger_max	toe_max
		1= male, 2=female
O_americanus 4n	Achiras	1	ECOALMUNRC 161	45.2	19.2	15.4	5.95	2.7	4	3.8	4.4	6.4	21.55	18.5	15.7	25.2	5.95	8.85
O_americanus 4n	Achiras	1	ECOALMUNRC 162	47.4	19.7	15.7	8.5	3	3	3.55	4.4	6.4	19.2	15.7	15.3	28.3	6.5	8.3
O_americanus 4n	Achiras	1	ECOALMUNRC 163	45.5	20	15.3	8.4	3.6	3.55	4.3	4.6	6.6	23	15.95	15.8	27.3	6.6	9.8
O_americanus 4n	Achiras	1	ECOALMUNRC 164	49.1	20.6	16.3	7	3.8	3.8	3.5	4.3	6.6	20.2	15.4	15.8	26.45	8	10.25
O_americanus 4n	Achiras	1	ECOALMUNRC 165	44.25	19.5	15.25	7.4	2.9	3.55	3.7	3.5	6.35	20.25	18.25	15.2	24.55	5.55	7.9
O_americanus 4n	Achiras	1	ECOALMUNRC 166	44.15	19.35	15.2	6.9	2.95	3.3	3	3.7	6.5	19.15	19.15	15.25	24.4	6.55	7.35
O_americanus 4n	Chivilcoy, Buenos Aires	2	ECOALMUNRC 192	45.06	20.25	16.33	6.4	2.74	3.48	3.18	4.78	7.59	19.24	16.56	14.65	25.15	7.94	10.14
O_americanus 4n	Escuela 55	1	ECOALMUNRC 352	44.45	17.76	15.54	6.34	2.96	2.61	3.11	4.07	5.44	19.76	15.11	14.99	24.53	7.55	7.54
O_americanus 4n	Escuela 57	1	ECOALMUNRC 354	48.73	19.44	17.46	6.41	2.23	3.08	3.01	4.41	5.52	19.83	16.86	15.17	25.28	6.25	8.57
O_americanus 4n	Escuela 59	1	ECOALMUNRC 356	53.68	21.36	18.2	8.13	3.03	2.8	3.48	5.35	6.71	20.8	19.53	16.11	27.2	6.87	8.68
O_americanus 4n	Km 619 R IV	1	ECOALMUNRC 59	40.52	17.73	14.22	5.09	2.88	3.69	3.36	4.17	4.59	18.11	13.95	12.93	22.79	6.63	7.63
O_americanus 4n	Km 619 R IV	1	ECOALMUNRC 60	37.54	17.41	13.25	6.54	3.12	3.88	3.17	4.21	5.19	16.35	13.98	12.67	22.37	6.25	6.58
O_americanus 4n	Km 619 R IV	2	ECOALMUNRC 61	38.62	17.13	13.78	7.38	3.28	3.82	3.54	4.52	5.59	20.67	15.93	14.92	23.77	6.64	8.1
O_americanus 4n	Km 619 R IV	2	ECOALMUNRC 62	41.5	18.89	15.31	8.15	3	3.98	3.55	4.65	6.2	21.96	17.34	15.28	27.66	7.6	10.57
O_americanus 4n	Km 619 R IV	1	ECOALMUNRC 142	42.6	20	12.9	6.5	3.5	3.5	3.8	3.9	5.45	17.6	19.5	14.2	24	5.95	9.4
O_americanus 4n	Km 619 R IV	1	ECOALMUNRC 143	44.4	19.22	13.3	7.3	2.9	3	3.9	4.4	5.1	19.2	17.7	14.3	25.45	6	9
O_americanus 4n	Km 619 R IV	1	ECOALMUNRC 144	39.8	18.3	14.9	6.9	3.8	3.5	3.5	4	5.5	17.2	16.8	13.7	21.1	4.6	7.7
O_americanus 4n	Km 619 R IV	1	ECOALMUNRC 145	43.6	19.7	15.3	7.6	3.5	3.3	2.7	4	5.5	19.4	15.3	14.4	21.5	7	8.95
O_americanus 4n	Km 619 R IV	1	ECOALMUNRC 146	38.6	16.3	13.25	6.55	2.7	2.65	3.9	3.8	5.6	17.7	16.15	13.3	23.2	5.75	9.55
O_americanus 4n	Km 624, Espinillo	1	ECOALMUNRC 211	45.79	20.25	14.64	7.96	3.55	3.39	3.51	5.11	7.71	20.18	17.98	15.34	25.22	6.99	9.31
O_americanus 4n	Km 624, Espinillo	1	ECOALMUNRC 212	46.79	20.28	14.91	7.78	2.7	2.94	3.12	4.7	7.44	19.29	17.58	15.44	24.56	6.38	7.98
O_americanus 4n	Km 657, RN8	1	ECOALMUNRC 213	44.76	20.75	15.58	6.28	2.35	3.78	3.9	5.31	7.74	18.66	16.65	14.84	29.2	5.57	9.51
O_americanus 4n	Km 657, RN8	1	ECOALMUNRC 214	44.13	21.27	15.6	7.04	2.45	3.03	4.16	5.03	7.87	21.12	17.27	15.37	27.36	7.21	10.85
O_americanus 4n	Km 657, RN8	1	ECOALMUNRC 215	40.17	19.15	14.29	5.03	2.6	3.17	3.45	5.05	6.81	18.48	14.73	13.4	25.03	6	9.82
O_americanus 4n	P. Sarmiento R IV	1	ZFMK 80893	42	19	14.7	7.1	3.1	4.5	3.5	5.1	7.4	20.9	15.2	14.2	24.1	5.5	8.7
O_americanus 4n	P. Sarmiento R IV	1	ZFMK 80894	51	20.5	15.6	7.7	2.9	3.6	3.2	5.5	5	19.4	15.1	15	26.1	4.9	8.3
O_americanus 4n	P. Sarmiento R IV	1	ZFMK 80895	45	20.8	14.9	7.4	3	3.9	3.5	5.2	6.6	22.5	17.5	16.1	26.9	6.2	10.2
O_americanus 4n	P. Sarmiento R IV	2	ZFMK 80896	49	21.6	15	8.2	3.2	4.1	3.7	4.5	6.4	21.3	17.2	16	26.8	6.4	9.6
O_americanus 4n	P. Sarmiento R IV	2	ZFMK 80897	47	20.5	14.1	7.1	3	3.5	3.6	4.4	5.5	19.6	15.3	14.6	25.4	6.3	9.3
O_americanus 4n	P. Sarmiento R IV	1	ZFMK 80898	52	21.7	14	8.6	3.1	4.3	3.3	4.7	6.5	17.7	21.3	16.3	25.8	6.8	8
O_americanus 4n	P. Sarmiento R IV	2	ZFMK 80899	37	17	12.7	5.9	2.7	2.9	2.9	4.3	4.9	18.5	13.6	12.2	21.4	5.5	6.8
O_americanus 4n	P. Sarmiento R IV	2	ZFMK 80900	44	19.4	14.8	7	3.1	3.7	3.6	5	5.9	19.5	16	14.9	25.2	5.7	9
O_americanus 4n	P. Sarmiento R IV	1	ZFMK 80901	49	21.5	15	7.1	3.6	3.8	3.6	5.4	6.6	21.9	18.1	15.8	30.2	7.6	9.2
O_americanus 4n	P. Sarmiento R IV	1	ZFMK 80902	50	20.3	15.5	7.8	3	3.1	3.5	5.2	6.9	22	15.5	14.6	27.1	6.8	9.2
O_americanus 4n	P. Sarmiento R IV	2	ZFMK 80903	51	22	16	7.6	3	3.3	3.6	5.4	6.5	21.4	17.1	15.1	25.7	5.8	9.4
O_americanus 4n	P. Sarmiento R IV	1	ZFMK 80904	47	19	13	7.3	3.2	3.9	3.3	4.6	6.4	20	16.7	14.3	24.3	5.9	9.6
O_americanus 4n	P. Sarmiento R IV	1	ZFMK 80905	44	20.5	15.2	7.5	3.2	3.5	3.2	4.6	5.9	20.9	16.4	14.7	24.3	5.3	9.1
O_americanus 4n	P. Sarmiento R IV	2	ZFMK 80906	48	20.7	15	7	3.4	3.6	2.9	4.6	6.1	21.3	15.5	14.8	26.3	5.8	8.5
O_americanus 4n	P. Sarmiento R IV	1	ZFMK 80907	43	19.3	13.7	6.4	3.3	3.5	2.9	4.6	6.1	18.5	15.7	14.3	24.5	5.9	8.4
O_americanus 4n	P. Sarmiento R IV	2	ZFMK 80908	41	19.4	12.2	6.8	3.1	3.8	3.5	3.5	5.2	19	15.8	14.2	25.1	6.1	9.7
O_americanus 4n	P. Sarmiento R IV	3	ZFMK 80909	37	17.1	12.7	6.8	2.9	2.9	3.1	4.2	5.3	17.7	13.1	12.8	21.7	6	7.9
O_americanus 4n	P. Sarmiento R IV	1	ZFMK 80910	42.27	20.17	14.15	8.81	3.57	3.55	3.6	4.77	5.69	19.96	15.4	14.52	23.32	8.07	9.09
O_americanus 4n	P. Sarmiento R IV	1	ZFMK 80911	36.08	18.1	13.25	6.18	2.97	2.89	3.23	3.77	6.06	18.69	15.24	13.8	23.7	6.3	8.21
O_americanus 4n	P. Sarmiento R IV	1	ZFMK 80912	40.44	18	13.31	5.72	2.63	3.37	2.31	3.43	5.55	18.75	15.78	13.04	22.43	6.38	6.94
O_americanus 4n	P. Sarmiento R IV	1	ZFMK 80913	43.36	21.62	14.53	7.36	2.7	3.45	3.97	4.27	7.21	21.78	18.91	16.35	28.24	6.66	8.56
O_americanus 4n	P. Sarmiento R IV	1	lost	39.18	19.15	12.36	6.75	2.84	3.09	2.92	4.01	6.47	19.14	15.3	14.19	18.53	4.3	5.97
O_americanus 4n	P. Sarmiento R IV	2	lost	38.1	17.76	12.13	6.22	2.81	2.79	2.89	4.16	5.78	18.84	11.48	13.48	22.19	5.92	7.69
O_americanus 4n	P. Sarmiento R IV	2	lost	39.44	18.25	13.38	7.38	2.96	3.6	3.26	4.14	6.52	19.3	14.96	14.53	25.02	5.14	8.06
O_americanus 4n	P. Sarmiento R IV	1	lost	28.78	15.41	10.28	6.36	2.59	2.57	2.66	3.89	5.91	17.33	11.41	12.04	20.95	5.26	6.69
O_americanus 4n	P. Sarmiento R IV	1	lost	35.6	16.85	12.45	5.75	2.7	3.1	2.45	3.9	5.1	18.8	12.5	12.9	23.2	6.6	7.4
O_americanus 4n	P. Sarmiento R IV	1	lost	34.2	17.5	11.7	6.2	2.65	3.15	3.3	3.7	5	17.9	11.85	13.1	23.1	6.95	7.2
O_americanus 4n	P. Sarmiento R IV	1	ECOALMUNRC 90	49.2	21.4	17.2	7.4	2.9	3.6	3.4	4.7	6.4	19.5	16.15	15.25	26.9	7.75	8.3
O_americanus 4n	P. Sarmiento R IV	1	ECOALMUNRC 91	49.75	21.1	14.75	7.25	3.6	3.6	4	4	5.95	21.4	16.3	15.3	25.95	6.55	8.25
O_americanus 4n	P. Sarmiento R IV	1	ECOALMUNRC 207	41.35	21.6	18.5	8.75	3.55	4.1	3.5	4.45	7.3	20.4	16.3	15.7	26.8	7.3	9.6
O_americanus 4n	P. Sarmiento R IV	2	ECOALMUNRC 208	42.4	21.2	17.4	7.5	3.5	3.7	3.9	3.8	6.55	20.3	16.1	15.5	26.5	5.5	8.55
O_americanus 4n	P. Sarmiento R IV	1	ECOALMUNRC 209	47.1	21.8	18.1	8.1	3.8	4.1	4.2	5.3	6.9	23.5	20.3	16.4	27.9	8.2	10.4
O_americanus 4n	P. Sarmiento R IV	1	ECOALMUNRC 210	49.3	21.1	16.2	7.7	3.5	3.1	3.8	4.95	7	22.4	18.5	15.7	28.25	6.9	10.75
O_americanus 4n	Piedra Blanca	1	ECOALMUNRC 103	46.82	19.25	12.23	7.18	3.89	3.47	3.56	4.44	5.72	16.7	16.45	13.9	23.55	5.98	7.39
O_americanus 4n	Piedra Blanca	1	ECOALMUNRC 104	44.38	20.3	14.18	6.99	3.59	3.46	3.28	3.96	6.03	20.35	14.92	14.68	22.25	5.47	8.05
O_americanus 4n	Piedra Blanca	1	ECOALMUNRC 105	40.57	18.26	11.8	5.81	3.32	3.51	3.24	3.66	6.23	19.29	15.59	14.17	23.83	6.23	8.31
O_americanus 4n	Piedra Blanca	1	ECOALMUNRC 106	42.75	17.99	10.8	5.91	3.31	3.3	3.82	4.22	6.47	17.69	13.84	13.5	23.32	5.92	9.01
O_americanus 4n	Piedra Blanca	1	ECOALMUNRC 107	42.89	19.87	11.94	6.23	3.24	3.44	3.78	4.3	5.97	18.64	18.48	14.89	25.02	5.6	8.95
O_americanus 4n	Punilla	1	ECOALMUNRC 216	47.59	19.25	13.86	5.33	3.31	3.09	3.24	4.33	6.42	21.16	17.98	14.33	26.47	5.91	9.99
O_americanus 4n	Punilla	1	ECOALMUNRC 217	49.95	19.65	17.66	6.58	3.31	3.07	4.14	4.51	6.19	20.2	18.14	15.25	26.42	6.06	9.41
O_americanus 4n	Punilla	1	ECOALMUNRC 218	41.3	17.43	15.63	6.01	2.17	2.8	2.32	4.57	6.46	15.95	14.09	13.58	24.05	6.55	7.48
O_americanus 4n	Punilla	1	ECOALMUNRC 219	38.8	20.08	14.91	6.39	3.12	3.05	2.8	4.4	6.33	18.87	18.46	15.26	25.78	7.09	9.07
O_cordobae	Berrotaran	2	lost	51.54	21.6	17.01	8.23	3.2	4.92	3.85	5.23	5.7	21.27	16.97	16.24	26.06	6.03	7.32
O_cordobae	Berrotaran	1	lost	44.1	18.29	12.15	7.02	2.87	3.41	3.52	4.19	5.56	20.29	19.02	15.47	25.56	5.36	8.16
O_cordobae	Berrotaran	1	lost	45.2	20.98	12.32	6.97	2.61	3.54	3.25	4.23	6.74	22.37	15.63	17.21	26.88	5.88	7.17
O_cordobae	Berrotaran	1	lost	39.44	18.05	12.41	6.68	2.94	3.43	3.09	4.18	5.9	17.97	16.23	14.17	23.22	4.29	6.23
O_cordobae	Berrotaran	1	lost	44.68	19.02	12.2	6.44	2.97	3.14	3.25	4.29	6.74	21.06	17.75	15.35	25.38	5.74	7.56
O_cordobae	Berrotaran	1	lost	40.96	19.81	12.69	6.15	3.23	3.43	2.88	4.65	6.51	21.13	18.24	14.97	24.47	6.23	8.13
O_cordobae	Berrotaran	1	lost	40.29	18.05	13.34	6.37	2.09	2.85	3.1	3.93	6.88	20.33	16.09	14.21	22.52	5.32	7.61
O_cordobae	Berrotaran	1	ECOALMUNRC 147	42.2	16.6	12.4	5.3	2.5	2.85	2.6	3	4.9	17.25	14.2	13.1	22.2	6.9	6.4
O_cordobae	Berrotaran	1	ECOALMUNRC 148	48.5	20.3	15.4	6.85	3.5	3.55	3.55	4.4	5.8	20.3	18.25	16.4	25.4	6.6	9.45
O_cordobae	Berrotaran	1	ECOALMUNRC 149	39.4	16.95	12.5	6	3	3.45	3.55	4.35	5.3	17.2	15.3	13.3	21.3	5.3	8
O_cordobae	Berrotaran	1	ECOALMUNRC 150	44.6	18.3	13.8	5.95	3.85	3.55	3.5	3.6	5.6	18.25	16.6	13.25	22.55	5.95	8.3
O_cordobae	Berrotaran	1	ECOALMUNRC 151	40.45	19.45	14.8	6.5	3.9	3.55	2.9	3.9	6.25	21.2	17.25	15	26.35	5.4	9.8
O_cordobae	Berrotaran	1	ECOALMUNRC 152	35.3	16.8	13.25	5.55	2.4	3	3.7	2.75	4.55	15.7	15.25	12.95	22.85	6.3	9.85
O_cordobae	Berrotaran	1	ECOALMUNRC 153	43.3	19.2	14.1	7.25	3	4.15	2.6	3.75	5.5	19.85	18.55	15.1	25.5	7.65	9.25
O_cordobae	Berrotaran	1	ECOALMUNRC 154	40.5	18.4	13.6	5.95	3.45	3.3	3.5	3.4	5.5	18.1	12.3	14.35	24.25	6	8.8
O_cordobae	Berrotaran	1	ECOALMUNRC 155	45.55	20.4	15.5	6.9	3.55	3.8	3.5	4.2	5.7	21.3	19.8	16.3	27.45	6.4	8.25
O_cordobae	Berrotaran	1	ECOALMUNRC 156	46.1	20.2	15.1	6.4	3.3	3.45	3.25	4.45	5.3	19.4	19.6	15.95	26.4	6.15	6.9
O_cordobae	Berrotaran	1	ECOALMUNRC 157	44.1	22.1	15.3	7.3	2.95	3.55	3.5	4	5.45	21.4	19.45	16.65	28.55	8.1	8.6
O_cordobae	Río Santa Rosa, Sant	1	FML 10226	51.9	22.6	17.3	7.4	3.4	4.2	3.9	4.45	6.35	20.55	19.1	16.35	27.55	7	10.75
O_cordobae	Río Santa Rosa, Sant	2	ECOALMUNRC 194	42.33	20.22	16.15	7.72	3.09	3.59	5	4.2	6.56	19.83	18.95	13.73	26.64	6.14	8.5
O_cordobae	Río Santa Rosa, Sant	1	ECOALMUNRC 195	43.5	20.75	15.7	7.5	3.1	3.2	3.55	4.45	6.9	18.5	20.45	15.6	25.6	6.3	9.6
O_cordobae	Río Santa Rosa, Sant	2	ECOALMUNRC 196	41.9	17.3	14.2	5.95	2.9	2.9	3.5	2.9	5.6	15.75	15.8	13.5	22	4.3	9.1
O_cordobae	Río Santa Rosa, Sant	1	ECOALMUNRC 197	43.33	18.96	14.09	6.67	2.35	2.06	2.65	3.31	7.37	19.34	17.51	14.91	24.71	6.41	7.55
O_cordobae	Río Santa Rosa, Sant	1	ECOALMUNRC 198	47.45	20.85	16.03	8.53	3.01	3.2	3.14	4.82	7.36	19.43	20.49	16.49	27.85	6.21	9.25
O_cordobae	Río Santa Rosa, Sant	1	ECOALMUNRC 199	46.88	20.28	16.52	7.51	2.83	3.16	3.97	4.46	7.55	19.57	19.08	14.87	26.93	7.28	7.51
O_cordobae	Río Santa Rosa, Sant	1	ECOALMUNRC 200	47.82	18.02	14.07	6.84	2.9	3.02	3.49	4.33	6.93	16.89	18.04	14.7	24.43	6.15	6.67
O_cordobae	Río Santa Rosa, Sant	1	ECOALMUNRC 201	41.97	19.12	14.05	7.45	3.11	2.83	3.43	3.89	6.3	17.66	17.52	13.55	23.38	6.25	7.96
O_cordobae	Río Santa Rosa, Sant	1	ECOALMUNRC 202	42.74	18.24	13.15	6.88	3.09	2.56	3.25	3.9	6.24	15.9	16.48	13.61	24.14	6.67	9.13
O_cordobae	Río Santa Rosa, Sant	1	ECOALMUNRC 203	45.87	20.08	14.5	7.29	3.2	2.88	3.94	3.7	6.08	18.87	17.93	14.47	26.21	8.4	9.27
O_cordobae	Río Santa Rosa, Sant	1	ECOALMUNRC 204	46.42	19.74	14.06	7.06	2.91	3.04	4.46	3.84	6.44	17.91	16.18	13.82	22.95	6.25	9
O_cordobae	Río Santa Rosa, Sant	1	ECOALMUNRC 205	44.54	18.71	14.5	6.96	3.33	3.1	3.75	3.92	6.52	19.29	15.08	14.07	23.79	6.92	8.03
O_cordobae	Río de los Sauces, C	1	ECOALMUNRC 245	47.49	20.29	15.67	6.92	3.23	3.18	4.19	5.4	7.36	22.45	15.57	16.72	21.78	7.96	8.17
O_cordobae	Río de los Sauces, C	1	ECOALMUNRC 246	45.43	18.84	15.03	6.33	2.94	2.86	5.09	4.58	7.35	17.42	17.49	14.94	23.02	5.43	8.07
O_cordobae	Río de los Sauces, C	1	ECOALMUNRC 247	44.73	20.1	14.78	7.23	2.29	3.19	3.05	3.96	6.63	19.85	16.67	15.23	23.21	7.12	9.09
O_cordobae	Río de los Sauces, C	1	ECOALMUNRC 248	49.38	20.58	16.89	7.82	3.16	3.05	3.06	4.81	8.06	23.35	19.74	16.01	28.67	7.48	10.25
O_cordobae	V.G. Belgrano	2	ZFMK 80909	62	25.7	18.9	8	4.5	4.3	4.1	5.7	7.9	25	19.8	19.6	33.1	8.9	13.2
O_cordobae	V.G. Belgrano	1	ZFMK 80933	49	21.6	13.6	7.6	3.5	3.9	3.6	5.2	7.3	20.5	17.8	16.4	25	6.7	11
O_cordobae	V.G. Belgrano	1	ZFMK 80934	50	20.4	14.3	7.8	3.6	3.3	2.9	5	6.2	20.2	15.2	15.2	25.5	5.9	8.1
O_cordobae	V.G. Belgrano	1	ZFMK 80935	52	22.7	15.5	7.8	3.9	4.2	3.1	5.6	7.6	23.1	17.7	15.6	27	5.9	9.3
O_cordobae	V.G. Belgrano	2	ZFMK 80936	56	22	15.5	8	3.2	3.3	3.4	4.7	6.9	24.3	16.6	16	27.1	7.8	10.9
O_cordobae	V.G. Belgrano	2	ZFMK 80937	49	19.4	13.6	7.1	2.9	3.4	2.9	4.6	6.5	22.2	17.3	17.2	24.2	5.8	8.6
O_cordobae	V.G. Belgrano	1	ZFMK 80938	58	24.9	15.1	8.4	4	4.2	3.7	5.1	7.1	24.2	21.7	18.6	31.5	8.3	13.6
O_cordobae	V.G. Belgrano	2	ZFMK 80939	57	23.1	16.8	8.9	3.9	3.7	3.6	5.7	7.2	23.3	21.3	18.2	27.2	7.1	11
O_cordobae	V.G. Belgrano	1	lost	41.1	19.87	15.33	7.23	3.34	3.54	3.26	4.82	6.19	21.29	15.63	16.35	25.99	5.08	7.53
O_cordobae	V.G. Belgrano	2	lost	49.62	21.95	15.98	7.62	2.72	2.71	3.58	4.42	6.26	22.32	15.55	16.53	27.77	6.23	8.76
O_cordobae	V.G. Belgrano	2	lost	49.42	22.28	13.28	6.82	3.1	3.74	3.77	4.52	6.81	24.11	18.65	16.2	26.03	6.76	7.29
O_cordobae	V.G. Belgrano	2	lost	44.07	21.27	17.23	7.74	3.18	3.6	4.08	5.34	6.04	23.1	17.27	16.48	27.1	6.19	8.47
O_cordobae	V.G. Belgrano	1	lost	38.85	18.95	14.94	6.78	2.57	3.37	3.29	4.71	6.51	20.8	14.43	14.61	25.87	6.38	8.16
O_cordobae	V.G. Belgrano	2	lost	41.52	19.51	13.64	6.84	3.15	3.59	4.01	4.1	5.76	20.65	17.46	15.92	26.8	6.29	8.57
O_cordobae	V.G. Belgrano	2	lost	50.46	22.05	14.73	7.63	3.87	4.34	3.43	4.33	6.66	23.27	20.28	16.25	28.22	6.78	7.64
O_cordobae	V.G. Belgrano	1	lost	39.87	19.29	13.3	7.49	1.77	3.26	2.58	2.6	6.07	20.82	16.32	14.92	25.54	5.45	7.62
O_cordobae	V.G. Belgrano	1	lost	44.6	19.38	13.4	6.23	2.53	3.69	2.29	3.71	6.47	18.79	16.96	13.07	24.03	6.25	7.51
O_cordobae	V.G. Belgrano	1	FML 10222	51.5	21.65	16.1	7.5	3.1	4	3.5	4.65	7.1	23.1	16.1	15.45	24.65	8.4	7.9
O_cordobae	V.G. Belgrano	2	FML 10223	43.55	21.1	15.35	7.3	3.3	3.35	3.55	3.95	5.95	20.15	15.95	15.25	25.55	7.1	9.15
O_cordobae	V.G. Belgrano	2	ECOALMUNRC 87	48.85	21.6	16.25	8.2	3.8	3.55	4.3	4.8	6.3	20.3	15.3	16.3	27.7	7.65	10.45
O_cordobae	V.G. Belgrano	1	FML 10224	46.1	21.1	14.45	6.4	3	3.9	3.9	4.45	6.6	21.65	17.1	16.1	27.3	6.5	8.25
O_cordobae	V.G. Belgrano	1	FML 10225	40	18.2	12.3	5.5	3	3.3	2.95	4.55	5.45	18.2	14.4	14.3	23.2	6	9.2
O_lavillai	Los Colorados Salta	2	FML 05879	57.24	26.12	14.96	9.8	3.34	4.96	5.1	5.7	7.23	25.5	20.05	19.95	33.85	9.98	10.03
O_lavillai	Los Colorados Salta	2	FML 04915	75.53	31.66	19.43	9.45	4.95	5.2	5.2	5.55	8.87	29.4	28.32	24.41	37.79	10.57	14.41
O_lavillai	Los Colorados Salta	2	FML 06594	73.31	30.1	18.87	8.33	4.7	5.5	5.5	6.12	7.79	31.12	26.64	24.42	38.32	9.98	11.65
O_lavillai	Los Colorados Salta	2	FML 05305-1	69.99	28.88	18.89	8.85	4.25	4.41	4.99	5.54	8.33	30.2	26.65	21.72	35.51	10.01	10.58
O_lavillai	Los Colorados Salta	2	FML 03580-2	70.45	31.66	17.21	8.86	4.43	5.15	5.65	6.11	7.78	29.42	26.69	20.54	35.54	9.43	12.78
O_lavillai	Monte Quemado SdE	1	FML 03758	59.43	29.41	15.85	9.96	4.9	4.3	4.9	5.6	7.23	29.42	24.97	21.13	35.57	7.77	11.72
O_lavillai	Monte Quemado SdE	1	FML 03580-1	62.23	21.7	15.3	8.94	3.86	4.99	4.41	5.3	7.74	24.4	27.77	20	31.67	7.79	11.71
O_lavillai	Monte Quemado SdE	1	FML 03580-2	65	28.31	17.75	8.33	3.88	4.97	5.2	5.69	7.22	30.56	25	22.22	35.55	9.97	14.94
O_lavillai	Monte Quemado SdE	2	FML 03580-3	68.89	30.55	19.43	9.43	4.94	6.12	5.53	5.61	7.23	28.84	30.58	23.86	38.9	10.01	12.23
O_lavillai	Pocitos Salta	2	FML 02794-1	60.58	25.56	15.57	7.78	4.95	4.93	4.95	5	6.66	27.8	22.81	19.46	32.79	8.89	12.21
O_lavillai	Pocitos Salta	1	FML 02794-2	63.32	25.56	12.21	9.44	4.98	4.44	5	5.59	7.76	29.41	22.24	19.95	32.8	9.41	11.67
O_lavillai	Pocitos Salta	1	FML 02794-3	61.68	26.64	17.73	8.88	4.97	5.2	4.97	5.58	7.74	28.32	22.77	19.45	33.88	7.78	10.57
O_lavillai	Pocitos Salta	2	FML 02794-4	71.66	29.43	19.42	9.96	5	5	4.97	6	8.32	30.55	27.79	20.58	37.8	8.35	10.6
O_lavillai	San Javier Salta	1	FML 04911	65.55	27.79	16.69	9.95	3.88	4.94	4.95	5.6	7.77	26.66	25.56	20.55	34.42	8.9	11.12
O_lavillai	San Javier Salta	1	FML 04922-1	63.65	30.02	17.21	8.89	4.94	4.99	5.1	5.5	7.78	29.95	26.67	22.75	31.64	9.95	8.99
O_lavillai	San Javier Salta	1	FML 04922-2	64.95	30	17.73	9.94	5	5.3	5.1	6.14	7.78	30.2	22.2	21.15	35.58	9.97	10.58
O_lavillai	Villa La Punta SdE	1	ECOALMUNRC 179	47.77	22.44	18.27	6.9	4.25	3.65	5.32	5.69	6.76	24.56	19.33	18.85	30.91	8.23	10.26
O_lavillai	Villa La Punta SdE	1	ECOALMUNRC 180	45.23	22.77	17.88	8.2	3.78	3.81	4.19	4.48	6.8	23.06	18.31	16.84	28.03	6.58	8.93
O_lavillai	Villa La Punta SdE	1	ECOALMUNRC 181	53.47	22.97	16.62	8.04	3.58	3.52	3.79	4.89	7.54	26.02	20.91	17	31.31	9.02	9.9
O_lavillai	Villa La Punta SdE	1	ECOALMUNRC 182	56.55	22.69	18.64	8.24	4.3	4.02	3.93	5.07	7.22	24.41	19.9	17.68	30.11	8.67	11.36
O_lavillai	Villa La Punta SdE	2	ECOALMUNRC 183	52.08	22.2	17.17	8.17	3.05	3.87	4.89	5.81	7.47	25.49	20.26	18.77	30.21	7.69	9.55
O_lavillai	Villa La Punta SdE	1	ECOALMUNRC 184	53.29	25.01	18.6	7.69	3.59	4.43	5.16	4.91	7.07	26.64	22.85	18.67	32.11	8.75	10.13
O_lavillai	Villa La Punta SdE	2	ZFMK 80952	48.84	22.39	17.09	7.57	3.53	3.9	4.18	4.76	7.65	25.27	19.09	18.02	28.49	7.5	7.56
O_lavillai	Villa La Punta SdE	1	ZFMK 80953	48.5	21.39	17.58	6.94	2.93	3.69	3.09	5.21	7.02	21.04	18.45	17.16	28.14	8.76	9.5
O_lavillai	Villa La Punta SdE	1	ECOALMUNRC 187	40.81	18.74	14.36	6.7	2.08	3.67	3.47	3.94	6.54	17.6	17.15	14.38	23.25	6.8	9.35
O_lavillai	Villa La Punta SdE	1	ECOALMUNRC 188	42.36	19.11	16.98	7.03	3.02	3.72	3.64	3.84	6.07	20.58	18.03	15.95	26.49	7.61	9.37
O_lavillai	Villa La Punta SdE	1	ECOALMUNRC 189	48	22.77	19.33	7.2	3.03	4.04	4.51	4.76	6.54	24.88	19.92	17.81	28.72	7.42	8.94
O_lavillai	Villa La Punta SdE	2	ECOALMUNRC 190	52.2	21.26	16.39	7.23	3.22	4.1	4.48	4.53	5.95	23.7	18.69	17.78	27.96	8.81	9.57
O_occidentalis	Achiras	1	ECOALMUNRC 160	48.4	22.7	17.2	7.35	3.35	3.6	4.4	3.85	7.4	23.1	17.6	19.2	30.4	7.7	10.95
O_occidentalis	Achiras	1	ECOALMUNRC 220	50.29	22.66	17.54	7.03	4.21	4.05	4.64	5.81	7.6	23.54	18.53	19.07	26.25	7.67	10.06
O_occidentalis	Achiras	2	ECOALMUNRC 221	42.57	22.34	16.67	7	3.06	4.04	3.88	4.95	7.06	19.98	20.23	18.49	31.52	7.6	10.62
O_occidentalis	Achiras	1	ECOALMUNRC 222	55.83	23.89	18.21	8.31	4.8	4.44	4.27	4.93	7.35	23.85	23.14	20.29	32.43	7.85	12.12
O_occidentalis	Achiras	1	ECOALMUNRC 223	53	24.93	18.09	8.59	3.91	3.91	4.82	5.19	6.87	22.34	21.92	19.06	32.18	8.51	10.68
O_occidentalis	Alpa Corral	1	lost	55.78	27.01	21.48	10.04	3.27	4.46	4.52	5.97	7.98	25.79	20.56	22.28	34.32	7.4	9.48
O_occidentalis	Alpa Corral	1	lost	47.5	23.1	15.6	7.9	3.9	3.8	4.85	5.25	6	25.25	20.7	19.45	34.8	7.45	11.1
O_occidentalis	Alpa Corral	1	ECOALMUNRC 82	47.24	21.07	17.56	8.35	3.13	3.85	3.65	4.56	6.32	22.61	20.04	18.4	31.84	6.21	10.79
O_occidentalis	El Trapiche SL	2	FML 10227	48.3	24.35	16.8	6.95	2.7	4.9	4.2	2.95	6.3	24.35	19.4	19.75	31.4	9.3	12.3
O_occidentalis	El Trapiche SL	1	lost	49.7	25.4	18.1	9	3.35	3.7	4.2	6.3	7.65	23.65	21.4	18.9	32.5	8.25	10.25
O_occidentalis	Las Albahacas	1	lost	49.04	22.84	16.25	7.66	3.36	3.95	3.31	3.78	7.66	24.18	21.58	19.92	35.05	6.58	12.84
O_occidentalis	Las Albahacas	1	ECOALMUNRC 169	55.98	26.51	19.14	9.55	4.76	3.53	4.36	5.69	7.94	26.36	25.44	20.71	33.03	9.05	13.2
O_occidentalis	Las Albahacas	1	ECOALMUNRC 170	50.22	25.05	19.42	8.83	3.87	3.59	4.79	5.85	7.52	27.42	25.88	20.57	35.52	8.52	10.72
O_occidentalis	Las Albahacas	1	ECOALMUNRC 171	53.14	25.65	19.89	7.95	4.14	4.22	4.78	5.22	6.47	25.66	22.23	20.55	34.23	6.89	10.64
O_occidentalis	Las Albahacas	1	ECOALMUNRC 172	48.53	24.57	19.45	7.2	3.81	4.1	4.3	4.81	7.39	24.53	24.14	20.08	33.46	7.19	10.76
O_occidentalis	Rodeo Viejo, Cba.	1	ECOALMUNRC 311	53.12	25.47	20.23	7.91	3.43	3.42	5.31	4.8	7.21	26.81	24.54	19.81	33.05	8.06	11.12
O_occidentalis	Rodeo Viejo, Cba.	1	ECOALMUNRC 312	47.29	25.11	17.67	8.76	3.8	2.93	3.28	4.8	7.64	23.58	22.93	19.19	29.71	7.02	11.93
O_occidentalis	Rodeo Viejo, Cba.	1	ECOALMUNRC 313	51.29	23.35	21.18	8.51	4.11	3.38	5.17	5.91	7.5	23.31	23.86	19.31	32.79	7.06	9.65
O_occidentalis	Rodeo Viejo, Cba.	1	ECOALMUNRC 314	53.38	24.89	19.73	7.7	3.09	3.68	4.29	6.04	7.16	21.44	22.38	20.15	30.24	7.47	8.74
O_occidentalis	Rodeo Viejo, Cba.	1	ECOALMUNRC 315	51.62	24.37	18.65	8.43	4.03	3.26	4.42	5.18	8.04	23.57	22.97	19.67	31.29	7.26	8.4
O_occidentalis	Rodeo Viejo, Cba.	1	ECOALMUNRC 316	58.24	26.38	21.27	8.18	3.62	3.23	4.61	5.88	7.21	26.09	26.42	22.67	35.96	9.64	11.52
O_occidentalis	V.G. Belgrano	1	ZFMK 80940	65	26.5	18.6	9.5	3.4	4.4	4.5	5.8	8.3	24.3	21.3	19.1	31.7	6.4	11.7
O_occidentalis	V.G. Belgrano	1	ZFMK 80941	63	25.9	18.9	9.7	4.4	3.7	3.8	5.9	8.9	24	23.6	19.3	33.6	6.1	11.2
O_occidentalis	V.G. Belgrano	1	ZFMK 80942	66	25.7	18.7	9.6	4.5	3.5	4	5.5	7.3	23.3	21.8	19.6	33.1	7.7	10.9
O_occidentalis	V.G. Belgrano	2	ZFMK 80943	66	27.9	22.4	9.3	4.7	4.5	5.3	5	7.8	27.1	25.1	23.9	36.3	8.1	7.9
O_occidentalis	V.G. Belgrano	1	ZFMK 80944	66	29.2	19.8	10.7	4.4	4.2	4.7	5.2	9.2	26.1	25.2	21.6	34.3	7.4	11.9
O_occidentalis	V.G. Belgrano	1	ZFMK 80945	58	28.1	18.2	10.5	4.8	3.7	5.2	6.2	8	27.4	23	21.3	33.4	7.1	11.2
O_occidentalis	V.G. Belgrano	1	ZFMK 80946	60	26.2	17.6	9.4	4.3	3.5	4.4	5.1	8.4	24.4	18.4	19.2	30	7.4	12
O_occidentalis	V.G. Belgrano	2	lost	42.89	20.76	16.96	7.54	3.16	3.5	3.01	4.85	6.89	22.23	18.78	17.51	28.89	6.66	9.37
O_achalensis	P. Achala	1	ZFMK 80917	60	24	16.2	10	4.6	3.1	5.1	5.7	6.8	25.9	21.1	19.7	31.4	7.3	10.5
O_achalensis	P. Achala	1	ZFMK 80918	54	21.2	15.9	9.3	3.4	4.1	3.3	5.8	7.1	23.4	19.3	17.7	30.5	6.1	10.5
O_achalensis	P. Achala	1	ZFMK 80919	46	19.8	15	9.2	3.8	3.6	3.6	5.4	7.2	23.9	18	17.5	28	7.1	11.7
O_achalensis	P. Achala	1	ZFMK 80920	53	21.5	16.7	8.9	3.9	3.3	3.6	4.8	7.7	24.2	20.5	18.1	30.5	5.9	10.5
O_achalensis	P. Achala	1	ZFMK 80921	51	22.4	18.9	8.2	4	3.7	3.4	5.2	6.7	23.8	20.7	18.1	32	7	11.1
O_achalensis	P. Achala	2	ZFMK 80922	51	22	15.4	7.4	3.6	3	3.4	4.6	7.6	23.6	18.5	17.6	31	7	9.1
O_achalensis	P. Achala	1	ZFMK 80923	56	22.4	17	7	4.3	2.9	4	4.5	7	22.7	19.2	13.4	29.5	6.8	6.9
O_achalensis	P. Achala	1	ZFMK 80924	48	20.2	16.2	8	4.2	3.2	3.5	4.8	6.8	21.9	17.3	16.5	28.3	7	8.9
O_achalensis	P. Achala	1	ZFMK 80925	44	20.3	14.8	7.4	3.8	2.6	3.3	4.6	6.2	22.1	17	16.1	27.1	6.2	9.8
O_achalensis	P. Achala	1	ZFMK 80916	46	20.8	16.2	7.1	3.8	3.4	3.9	5.4	7.1	21.9	19	17.1	28.4	6.4	9.3
O_achalensis	P. Achala	1	lost	53	22.7	15.4	8.7	4.1	3.5	4.1	5.5	7.4	22.5	21.1	18.4	31.9	7.1	10.3
O_achalensis	P. Achala	1	lost	48	21.3	15.4	8.3	3.9	3.3	3.4	5.3	7.3	20.5	17.7	18.9	29.3	6.3	10.4
O_achalensis	P. Achala	2	lost	42	19.2	13.1	6.9	3.2	2.8	3.3	4.1	6.7	17.5	15.1	14.5	24.1	5.9	9
O_achalensis	P. Achala	1	lost	53	22.4	17.1	10.3	3.2	3.2	5	5.9	7.2	23.1	20	19	32.9	6.7	11.9
O_achalensis	P. Achala	1	ECOALMUNRC 173	45.73	19.36	15.6	7.84	3.53	3.24	3.62	4.75	5.84	19.55	18.82	15.82	26.09	7.72	9.32
O_achalensis	P. Achala	1	ECOALMUNRC 174	45.79	19.1	15.24	8.74	3.55	3	4.34	4.39	7.61	19.38	18.62	16.98	29.62	8.18	9.78
O_achalensis	P. Achala	1	ECOALMUNRC 175	45.22	20.25	15.32	7.98	3.85	3.22	4.52	4.39	6.63	21.08	19.9	16.81	30.22	6.92	10.37
O_achalensis	P. Achala	1	ECOALMUNRC 176	47.42	21.92	16.92	7.26	3.4	3.35	4	5.8	6.39	19.86	22.61	17.31	27.81	6.86	10.37
O_achalensis	P. Achala	1	ECOALMUNRC 177	47.5	21.56	17.75	8.82	3.33	3.74	5.06	5.11	6.68	22.89	19.22	19.26	31.78	7.18	9.25
O_achalensis	P. Achala	1	ECOALMUNRC 178	45.07	20.24	16.86	8.2	3.71	3.13	3.42	5.45	6.49	21.26	19.33	16.26	29.12	6.31	7.61
O_cf_achalensis	Carolina SL	1	FML 10220	47.6	21.2	13.3	8	3.85	3.85	4	4.45	5.85	22.45	21.35	18.8	29.15	6.4	10.55
O_cf_achalensis	Carolina SL	1	FML 15316	49.45	23.2	17.5	7.85	3.8	3.3	4.9	4.85	6.65	23.5	20.5	20	29.8	8.2	7.85
O_cf_achalensis	Carolina SL	2	FML 15317	44.8	21.3	16	8.25	3.35	3.3	2.75	4.35	7.6	19.6	18.8	17.65	29.1	7.2	9.1
O_cf_achalensis	Carolina SL	1	FML 15318	43.05	20.5	16.25	8.3	3.55	3	4	5	7.15	21.55	18.7	18.8	28.15	7.2	9.45
O_cf_achalensis	Carolina SL	1	ZFMK 80954	38.85	19.3	19.2	7.65	3.2	2.6	3.6	4.1	6.25	20.1	16.65	16.6	28.45	7.65	8.7
O_cf_achalensis	Carolina SL	1	ZFMK 80955	44.5	20.65	15.5	7	3.3	3.2	3.7	4.15	6.6	21.45	19.2	18.9	29.8	7.5	9.25
O_cf_achalensis	Carolina SL	1	ZFMK 80956	36.3	15.4	11.7	5.05	3.2	3.1	3.7	3.25	5.55	15.9	15.5	14.9	22.4	6.1	7
O_cf_achalensis	Carolina SL	2	FML 10221	44.65	20.16	14.84	7.47	3.8	3.59	4.47	4.33	5.49	22.02	20.38	18.53	29.91	5.86	9.69
O_cf_achalensis	Carolina SL	1	ECOALMUNRC 158	40.7	21.55	15.4	7	3.75	4.35	4.35	4.35	6.4	20	18.75	17.15	25.8	6	9.3
O_cf_achalensis	Carolina SL	1	ECOALMUNRC 344	48.27	22.18	18.64	6.76	3.54	2.89	3.1	4.74	6.64	22.54	21.89	19.21	31.31	6.19	9.26
O_cf_achalensis	Carolina SL	1	ECOALMUNRC 339	51.85	24.21	19.08	8.97	3.23	3.43	4.18	4.88	6.85	24.05	23.9	19.78	33.99	7.49	10.3
O_cf_achalensis	Carolina SL	1	ECOALMUNRC 340	42.13	19.17	17.33	7.21	3.6	2.86	3.17	4.66	6.95	19.71	19.87	16.8	28.63	7.08	8.61
O_cf_achalensis	Carolina SL	1	ECOALMUNRC 341	46.31	20.42	16.05	7.29	3.74	3.36	3.75	4.81	6.47	20.19	18.77	17.76	29.99	6.67	8.8
O_cf_achalensis	Carolina SL	1	ECOALMUNRC 343	43.4	19.33	17.86	6.71	3.73	3.94	3.8	4.06	6.59	19.28	21.69	17.31	32.71	6.42	10.44
O_cf_achalensis	Carolina SL	1	ECOALMUNRC 345	53.95	24.14	18.29	8.28	4	2.89	3.81	4.94	7.47	23.94	19.78	19.45	33.24	7.07	9.46
O_barrioi	Aguadita LR	2	FML 03699	53.45	25.15	15.77	9.32	4.06	3.78	4.78	5.01	7.4	30.45	26.6	23.03	39.98	8.52	14.38
O_barrioi	Aguadita LR	1	FML 04554	60.06	25	18.3	8	3.8	3.6	3.6	4.9	7.45	23.5	25.75	21.1	38.5	10.25	13.6
O_barrioi	Aguadita LR	1	FML 04587	54.2	23.55	22.2	7.3	5	3.35	5.45	4.4	8.7	27	25.75	21	38.2	8.1	15.3
O_barrioi	Aguadita LR	1	ECOALMUNRC 112	67.25	28.35	22.7	8.85	4.6	4	5.3	5.7	8.35	28.3	23.85	23.55	39.3	8.45	14.75
O_barrioi	Aguadita LR	1	ECOALMUNRC 113	64.2	27.1	18.8	8.3	4.9	4.3	5.7	5.5	9.2	31.2	21.1	23.3	32.2	8.8	15
O_barrioi	Aguadita LR	1	ECOALMUNRC 114	62.3	24.35	19.4	8.6	4.9	4.1	4.4	4.9	8.1	26.4	25.1	21.2	32.5	7.3	13.25
O_barrioi	Aguadita LR	1	ECOALMUNRC 115	68.3	22.4	18.15	9.2	5.15	4.35	4.2	4.9	8.3	26.5	22.35	23.3	41.1	8.6	13.1
O_barrioi	Aguadita LR	1	ECOALMUNRC 116	58.2	24.4	18.7	7.45	4.3	4	4.9	4.55	8.25	26.35	26.6	21.55	26.3	10.1	13.7
O_barrioi	Aguadita LR	1	ECOALMUNRC 117	66.4	28.1	20.2	9.3	5.5	3.85	5.25	5.55	9.4	32.4	26.1	23.55	40.2	10.25	14.3
O_barrioi	Aguadita LR	1	ZFMK 80916	49.21	20.59	16.88	7.35	4.06	3.65	3.74	4.53	6.9	20.83	21.19	16.73	30.26	6.34	8.11
O_barrioi	El Carrizal Cat.	1	FML 03699-1	58.36	21.2	11.14	8.32	4.55	2.95	3.8	5.75	7.25	29.94	26.73	22.83	40.35	10.8	15.61
O_barrioi	El Carrizal Cat.	1	FML 03699-2	54.15	24.9	15.85	9.25	4.99	3.45	3.75	5.55	7.24	28.34	25.35	21.2	37.25	10.3	13.84
O_barrioi	El Carrizal Cat.	2	FML 03699-3	62.73	28.84	17.22	5.6	5.15	3.35	5.1	5.75	7.28	32.73	29.84	21.41	40.45	10.55	14.95
O_barrioi	El Carrizal Cat.	1	FML 03699-4	55.1	27.23	15.7	8.33	3.65	3.35	4.45	5.45	7.21	27.23	25.9	22.78	38.31	8.94	14.97
O_barrioi	El Carrizal Cat.	1	FML 03699-5	56.62	27.83	16.14	8.99	4.4	4.15	4.45	5.9	7.24	28.84	26.62	23.34	39.44	9.9	13.31
O_barrioi	El Carrizal Cat.	1	FML 03699-6	57.73	27.24	17.73	9.49	4.95	3.89	5.2	5.65	7.78	26.62	23.83	23.84	38.94	10.45	12.72
O_barrioi	El Carrizal Cat.	1	FML 03699-7	55.75	25.45	15.75	8.32	4.98	3.87	4.43	5.5	7.27	27.73	23.83	22.72	40.1	10.51	12.22
O_barrioi	El Carrizal Cat.	1	ECOALMUNRC 284	63.4	26.7	24.9	10	3.5	3.5	4.6	4.5	6.2	29.4	24.5	23.8	41.2	9.3	13.2
O_barrioi	El Carrizal Cat.	1	ECOALMUNRC 285	61.5	24.6	24.1	9.4	3.4	3.6	4.3	4.6	6.2	31.8	22	24.2	41.5	8.2	13.7
O_barrioi	El Carrizal Cat.	1	ECOALMUNRC 286	61.3	24.45	21.85	7.95	4.3	3.9	5	4	6.85	24.8	27.35	23.1	39.95	9.85	14.1
O_cf_barrioi	Aguada del Molle SJ	1	ECOALMUNRC 224	63.6	28.19	20.07	10.27	4.06	3.28	6	6.2	9.44	31.24	28.3	22.9	41.82	10.47	16.67
O_cf_barrioi	Aguada del Molle SJ	1	ECOALMUNRC 225	71.2	29.32	22.97	10.9	4.16	4.5	6.5	6.32	10.35	32.95	30.88	25.11	42.78	11.61	14.31
O_cf_barrioi	Aguada del Molle SJ	1	ECOALMUNRC 226	59.32	27.27	18.95	8.72	5.02	3.13	5.53	6.47	8.05	27.54	26.86	21.23	37.72	9.05	10.83
O_cf_barrioi	Aguada del Molle SJ	1	IMCNSJ 6000	63.2	28.35	19.82	10.42	4.46	3.84	5.18	6.05	8.31	26.43	24.75	21.47	35.85	9.01	11.13
O_cf_barrioi	Aguada del Molle SJ	1	IMCNSJ 6001	68.31	28.5	21.27	9.75	4.7	4.2	5.9	6.41	8.78	30.84	27.15	24.59	42.5	10.54	14.84
O_cf_barrioi	Aguada del Molle SJ	1	lost	66.67	27.63	20.47	10	4.77	3.73	6.44	6.28	7.88	28.38	23.53	22.24	37.55	9.2	14.99
O_cf_barrioi	Aguada del Molle SJ	2	lost	71.18	31.42	19.91	10.17	5.64	5.06	6.12	5.77	8.22	34.53	29.13	25.36	46.6	11.49	15.22
O_cf_barrioi	Aguada del Molle SJ	1	FML 15319	70.98	29.55	23.41	10.33	4.84	4.72	6.42	6.71	9.17	33.38	31.97	26.13	45.07	10.95	14.3
O_cf_barrioi	Aguada del Molle SJ	1	FML 15320	68.06	27.13	20.69	10.75	4.86	4.65	5.73	6.28	8.18	30.37	30.37	24.2	39.6	10.67	13.55
O_cf_barrioi	Aguada del Molle SJ	1	FML 15321	61.57	26.42	20.95	8.29	5.05	3.52	4.94	5.73	8.68	30.79	26.33	23.29	38.68	10.49	13.68
O_cf_barrioi	Aguada del Molle SJ	1	FML 15322	62.27	27.49	20.52	10.27	5.3	3.68	5.9	5.77	8.95	32.03	28.24	23.63	43.07	9.87	13.47
O_cf_barrioi	Aguada del Molle SJ	1	FML 15323	62.27	26.86	18.97	10.37	4.81	3.71	5.93	5.91	8.44	29.26	22.15	23.54	42.02	10.39	13.77
O_cf_barrioi	Aguada del Molle SJ	1	FML 15324	57.59	25.33	19.82	9.37	4.44	3.06	5.51	5.79	8.08	28.78	21.66	21.42	38.16	9.59	15.1
O_cf_barrioi	Aguada del Molle SJ	1	FML 15325	55.86	24.78	19.59	9.97	4.63	3.5	5.25	5.77	8.19	27.03	23.15	21.21	36.4	9.62	13.1
O_cf_barrioi	Huerta Guachi SJ	2	ECOALMUNRC 276	62.26	30.89	22.48	9.47	4.26	4.72	5.99	6.09	8.46	27.98	25.78	24.06	42.68	11.13	18.45
O_cf_barrioi	Huerta Guachi SJ	2	ECOALMUNRC 277	65.09	30.94	23.36	9.96	4.63	4.17	4.71	6.34	9.84	28.86	27.23	24.5	43.43	10.13	16.13
O_cf_barrioi	Huerta Guachi SJ	1	ECOALMUNRC 278	55.77	26.55	20.35	7.86	4.62	3.96	5.42	6.18	8.46	26.2	27.13	22.57	38.18	11.52	13.11
O_cf_barrioi	Huerta Guachi SJ	1	ECOALMUNRC 279	49.53	25.57	19.2	8.4	4.3	2.94	4.28	4.98	8.45	25.27	25.61	22.16	37.33	9.27	11.34
O_cf_barrioi	Huerta Guachi SJ	1	ECOALMUNRC 280	56.06	26.1	21.23	9.49	3.84	3.96	5.09	6.21	8.28	29.47	24.08	22.03	40.37	8.35	13.52
O_cf_barrioi	Huerta Guachi SJ	1	ECOALMUNRC 281	57.31	26.72	19.37	9.24	4.6	3.07	3.8	5.4	8.64	27.67	26.88	23.65	38.73	9.6	12.39
O_cf_barrioi	Huerta Guachi SJ	1	ECOALMUNRC 282	58.09	26.86	20.3	10.02	3.42	3.17	5.13	5.89	7.72	31.27	27.97	25.49	41.27	10.36	14.34
