# Supplementary material for: Integrative taxonomic reassessment of Odontophrynus populations in Argentina and phylogenetic relationships within Odontophrynidae (Anura)
Source: PeerJ. 2019 Feb 25;7:e6480. doi: 10.7717/peerj.6480 (PMC6394351; doi:10.7717/peerj.6480)
Supplement: Supplemental Information 6 [file peerj-07-6480-s006.xlsx]

## Sheet: Tabelle1
Nominal species	locality	Ind_Nr	Call_duration_X	Pulse_groups_per_call_X	Pulse_group_duration_X	Inter_Pulse_group_interval_X	Pulses_per_pulse_group_X	Pulse_duration_X	Inter_pulse_interval_X	Pulse_rate_X	Pulse_quotient_X	Freq_dom_X	Temp_water_X
O. americanus	Achiras	228	573.333	1	573.333		36	7.64444	10.2556	62.7907	0.745392	955	14.5
O. americanus	Achiras	229	846.667	1	846.667		43.3333	10.3778	8.55556	51.181	1.21299	1005	14.5
O. americanus	Achiras	230	700	1	700		36	8.68889	10.6111	51.4286	0.818849	905	14.5
O. americanus	Baretto	1	320	1	320		31	3.92222	6.46667	96.875	0.606529	1171.67	24
O. americanus	Baretto	2	313.333	1	313.333		30.6667	4.53333	5.67778	97.8726	0.798434	1180	24
O. americanus	Baretto	3	397.333	1	397.333		32.3333	4.84444	7.6	81.3758	0.637426	1060.33	24
O. americanus	Baretto	4	480	1	480		41	4.63333	7.02222	85.4167	0.65981	1010.33	24
O. americanus	Baretto	5	449	1	449		38	5.06667	6.57143	84.6325	0.771015	1209.57	27
O. americanus	Baretto	6	428	1	428		36	4.50667	7	84.1121	0.64381	1231	27
O. cordobae	La Carolina	307	497.167	1	497.167		43.8333	6.33333	3.88889	88.1661	1.62857	828.667	17.9
O. americanus	Piedra Blanca	210	273.333	1	273.333		26.6667	3.65556	6.46667	97.5612	0.565292	1206	27.9
O. americanus	Piedra Blanca	211	400	1	400		41.3333	3.62222	5.93333	103.333	0.610487	955	27.9
O. americanus	Piedra Blanca	212	320	1	320		32	3.77778	6.26667	100	0.602837	1155	27.9
O. americanus	Piedra Blanca	213	386.667	1	386.667		38.6667	3.97778	6.05556	100	0.656881	1055	27.9
O. americanus	Piedra Blanca	214	326.667	1	326.667		29	4.11111	6.84444	88.7754	0.60065	1206	27.9
O. americanus	Piedra Blanca	215	393.333	1	393.333		40.6667	3.15556	6.2	103.39	0.508961	1105	27.9
O. americanus	Piedra Blanca	216	400	1	400		41.3333	3.12222	6.31111	103.333	0.494718	1256	27.9
O. americanus	Piedra Blanca	217	420	1	420		44	3.46667	6.07778	104.762	0.570384	1256	27.9
O. americanus	Piedra Blanca	218	440	1	440		41	3.77778	6.84444	93.1818	0.551949	905	27.9
O. americanus	Piedra Blanca	219	426.667	1	426.667		39.6667	3.87778	6.86667	92.9688	0.564725	955	27.9
O. americanus	Piedra Blanca	220	406.667	1	406.667		41.6667	3.31111	6.23333	102.459	0.531194	1155	27.9
O. americanus	Piedra Blanca	221	573.333	1	573.333		54	4.1	6.03333	94.1861	0.679558	1055	27.9
O. americanus	Piedra Blanca	222	413.333	1	413.333		42	3.32222	6.32222	101.613	0.525483	1206	27.9
O. americanus	Piedra Blanca	223	500	1	500		46.6667	3.87778	6.55556	93.3334	0.591525	1005	27.9
O. americanus	Piedra Blanca	224	420	1	420		41	3.5	6.74444	97.619	0.518946	1105	27.5
O. americanus	Piedra Blanca	225	426.667	1	426.667		41	2.88889	6.98889	96.0937	0.413355	1155	27.5
O. americanus	Piedra Blanca	226	400	1	400		37	3.54444	7.33333	92.5	0.483333	1105	27.5
O. americanus	Piedra Blanca	227	360	1	360		36	3.06667	6.84444	100	0.448053	1155	27.5
O. americanus	Punilla	239	420	1	420		38.6667	3.62222	6.93333	92.0636	0.522436	1055	24.5
O. americanus	Punilla	240	360	1	360		31.6667	3.84444	7.08889	87.9631	0.542319	1055	24.5
O. americanus	Punilla	241	480	1	480		46	3.75556	6.6	95.8333	0.569024	955	24.5
O. americanus	Punilla	242	380	1	380		39	3.58889	6.32222	102.632	0.567663	1055	24.5
O. americanus	Punilla	243	400	1	400		38	4.17778	6.2	95	0.673835	905	24.5
O. americanus	Punilla	244	333.333	1	333.333		28.3333	4.31111	7.32222	85	0.588771	1055	24.5
O. americanus	Punilla	245	420	1	420		34.6667	4.14444	7.67778	82.5398	0.539797	1005	24.5
O. americanus	Rio Cuarto	7	560	1	560		37	5.38889	9.73333	66.0714	0.553653	1005	18
O. americanus	Rio Cuarto	8	580	1	580		37.6667	6.1	9.36667	64.9426	0.651245	1005	18
O. americanus	Rio Cuarto	9	606.667	1	606.667		39	6.02222	9.43333	64.2857	0.638398	1038.33	18
O. americanus	Rio Cuarto	10	566.667	1	566.667		36	4.85556	10.5778	63.5294	0.459033	1071.67	18
O. americanus	Rio Cuarto	11	586.667	1	586.667		38.3333	5.53333	9.84444	65.3408	0.562077	1088.33	18
O. americanus	Rio Cuarto	12	600	1	600		38	6.58889	9.21111	63.3333	0.71532	1055	18
O. americanus	Rio Cuarto	13	480	1	480		45	5.02222	5.92222	93.75	0.84803	1105	23
O. americanus	Rio Cuarto	14	420	1	420		38	5.44444	5.74444	90.4762	0.947776	1105	23
O. americanus	Rio Cuarto	15	440	1	440		40.6667	4.88889	5.74444	92.4243	0.851065	1055	23
O. americanus	Rio Cuarto	16	406.667	1	406.667		37.6667	4.64444	5.93333	92.623	0.782771	1038.33	23
O. americanus	Rio Cuarto	17	440	1	440		38.6667	4.72222	6.16667	87.8789	0.765765	1005	23
O. americanus	Rio Cuarto	18	380	1	380		35	4.81667	5.95833	92.1053	0.808393	971.25	25.5
O. americanus	Rio Cuarto	19	366.667	1	366.667		34	4.97778	5.68889	92.7272	0.875	952	25.5
O. americanus	Rio Cuarto	20	700	1	700		46	6.58889	8.76667	65.7143	0.751584	1055	25.5
O. americanus	Rio Cuarto	21	646.667	1	646.667		39.6667	6.27778	10.0556	61.3402	0.624307	1005	25.5
O. americanus	Rio Cuarto	22	633.333	1	633.333		39.6667	5.91111	10.0444	62.6317	0.588498	1021.67	25.5
O. americanus	Rio Cuarto	23	480	1	480		33	5.91111	8.86667	68.75	0.666666	1005	25.5
O. americanus	Rio Cuarto	24	633.333	1	633.333		41.3333	6.12222	9.53333	65.2631	0.642191	904	25.5
O. americanus	Rio Cuarto	25	633.333	1	633.333		40	6.4	9.33333	63.1579	0.685715	1005	25.5
O. americanus	Rio Cuarto	26	646.667	1	646.667		41.3333	5.82222	9.6	63.9174	0.606481	904	25.5
O. americanus	Rio Cuarto	27	571.667	1	571.667		39.3333	7.6	6.66667	68.8046	1.14	955	21
O. americanus	Rio Cuarto	28	553.333	1	553.333		40.3333	5.55556	7.94444	72.8915	0.699302	1105	21
O. americanus	Rio Cuarto	29	533.333	1	533.333		39.6667	7.25556	6.77778	74.3751	1.07049	1070	21
O. americanus	Rio Cuarto	30	560	1	560		40.6667	6.6	6.94444	72.6191	0.950401	1130	21
O. americanus	Rio Cuarto	31	526.667	1	526.667		38	4.87778	9.11111	72.1519	0.535366	1055	20
O. americanus	Rio Cuarto	32	573.333	1	573.333		42.6667	3.84444	9.63333	74.4187	0.399077	1155	20
O. americanus	Rio Cuarto	33	553.333	1	553.333		40.6667	4.37778	9.2	73.4941	0.475846	1105	20
O. americanus	Rio Cuarto	34	553.333	1	553.333		40.6667	4.15556	9.4	73.4941	0.442081	1105	20
O. americanus	Rio Cuarto	35	580	1	580		43	3.78889	9.6	74.1379	0.394676	1055	20
O. americanus	Rio Cuarto	36	640	1	640		47.3333	4.31111	9.1	73.9583	0.473748	1055	20
O. americanus	Rio Cuarto	37	640	1	640		48	4.4	8.88889	75	0.495	1055	20
O. americanus	Rio Cuarto	38	553.333	1	553.333		40.3333	4.3	9.73333	72.8915	0.441781	1055	19
O. americanus	Rio Cuarto	39	533.333	1	533.333		39.6667	4.75556	8.94444	74.3751	0.531678	1138.33	19
O. americanus	Rio Cuarto	40	526.667	1	526.667		39.3333	5.46667	8.07778	74.6834	0.676754	1055	19
O. americanus	Rio Cuarto	41	473.333	1	473.333		34.3333	6.31111	7.51111	72.5352	0.840237	1105	19
O. americanus	Rio Cuarto	42	693.333	1	693.333		51.3333	3.73333	9.7	74.0384	0.384879	1071.67	19
O. americanus	Rio Cuarto	43	646.667	1	646.667		48.3333	4.54444	8.88889	74.7422	0.511249	1105	19
O. americanus	Rio Cuarto	44	506	1	506		37.3333	5.48889	8.1	73.7812	0.677641	954	19
O. americanus	Rio Cuarto	45	506.667	1	506.667		38	5.8	7.61111	75	0.762044	954	19
O. americanus	Rio Cuarto	46	440	1	440		42.6667	4.63333	5.66667	96.9698	0.817646	1055	28
O. americanus	Rio Cuarto	47	386.667	1	386.667		38.6667	4.81111	5.17778	100	0.929184	854	28
O. americanus	Rio Cuarto	48	386.667	1	386.667		38.6667	4.68889	5.25556	100	0.892177	1005	28
O. americanus	Rio Cuarto	49	460	1	460		41.6667	4.47778	6.57778	90.5798	0.680743	1105	28
O. americanus	Rio Cuarto	50	366.667	1	366.667		35	4.2	5.95556	95.4545	0.705223	1256	28
O. americanus	Rio Cuarto	51	420	1	420		40	4.6	5.7	95.2381	0.807018	905	28
O. americanus	Rio Cuarto	52	433.333	1	433.333		38.6667	5.33333	5.86667	89.2309	0.90909	1055	28
O. americanus	Rio Cuarto	53	420	1	420		38	5.28889	5.94444	90.4762	0.88972	1055	28
O. americanus	Rio Cuarto	209	360	1	360		32.6667	4.17778	6.67778	90.7408	0.625624	955	23.4
O. americanus	Rio Cuarto	231	500	1	500		42	5.42222	6.58889	84	0.822934	1055	22
O. americanus	Rio Cuarto	232	520	1	520		43.3333	5.6	6.43333	83.3333	0.870467	1055	22
O. americanus	Rio Cuarto	233	386.667	1	386.667		31.6667	5.64444	6.41111	81.8966	0.880415	905	22
O. americanus	Rio Cuarto	234	520	1	520		43	5.57778	6.1	82.6923	0.91439	1005	22
O. americanus	Rio Cuarto	235	380	1	380		34.6667	5.16667	5.53333	91.2282	0.933736	955	23
O. americanus	Rio Cuarto	236	500	1	500		41	6.45556	5.64444	82	1.1437	1005	23
O. americanus	Rio Cuarto	237	493.333	1	493.333		40	6.54444	5.57778	81.0811	1.17331	1055	23
O. americanus	Rio Cuarto	238	400	1	400		36.6667	5.01111	5.72222	91.6667	0.875728	1005	23
O. cordobae	Athos Pampa	151	433.333	1	433.333		49	3.2	5.31111	113.077	0.602511	955	19.7
O. cordobae	Berrotaran	60	352	1	352		31.6	3.95333	7.34	89.7727	0.538601	919	20
O. cordobae	Berrotaran	61	433.333	1	433.333		46.6667	3.53333	5.78889	107.692	0.610364	1005	20
O. cordobae	Berrotaran	62	466.667	1	466.667		47.6667	3.42222	6.17778	102.143	0.553956	954	20
O. cordobae	Berrotaran	152	486.667	1	486.667		47.6667	3.27778	6.75556	97.9452	0.485197	1005	16.4
O. cordobae	Berrotaran	153	453.333	1	453.333		44.6667	3.03333	6.92222	98.5296	0.438202	1055	16.4
O. cordobae	Berrotaran	154	520	1	520		46	2.94444	7.66667	88.4615	0.384057	905	16.4
O. cordobae	Berrotaran	155	513.333	1	513.333		50.3333	3.33333	6.73333	98.0519	0.495049	1105	16.4
O. cordobae	Berrotaran	156	486.667	1	486.667		51	4.17778	5.3	104.794	0.78826	955	17.5
O. cordobae	Berrotaran	157	446.667	1	446.667		47.6667	4.01111	5.24444	106.716	0.764831	1005	17.5
O. cordobae	Berrotaran	158	420	1	420		46	4.13333	5.14444	109.524	0.803456	1005	17.5
O. cordobae	Berrotaran	159	440	1	440		47.3333	3.96667	5.16667	107.576	0.767742	1055	17.5
O. cordobae	Berrotaran	160	460	1	460		48.6667	3.73333	5.51111	105.797	0.677419	1005	17.5
O. cordobae	Berrotaran	161	440	1	440		46.3333	3.77778	5.62222	105.303	0.671937	955	17.5
O. cordobae	Berrotaran	162	453.333	1	453.333		46.3333	4.07778	5.47778	102.206	0.744422	1155	17.5
O. cordobae	Berrotaran	163	440	1	440		46	3.9	5.08889	104.545	0.766375	1005	17.5
O. cordobae	Berrotaran	164	453.333	1	453.333		46.6667	3.95556	5.74444	102.941	0.688589	1155	17.5
O. cordobae	Berrotaran	165	420	1	420		45	3.9	5.15556	107.143	0.756465	1005	17.5
O. cordobae	Berrotaran	166	480	1	480		49.3333	4	5.53333	102.778	0.722892	1055	17.5
O. cordobae	Berrotaran	167	446.667	1	446.667		45.6667	3.51111	6.23333	102.239	0.56328	1155	17.5
O. cordobae	Berrotaran	168	460	1	460		46	3.98889	5.93333	100	0.672285	955	17.5
O. cordobae	Berrotaran	169	520	1	520		56	3.9	5.26667	107.692	0.740506	1005	17.5
O. cordobae	Berrotaran	170	480	1	480		51	3.77778	5.37778	106.25	0.702479	1055	17.5
O. cordobae	Berrotaran	171	460	1	460		47.3333	3.85556	5.7	102.898	0.676414	955	15.5
O. cordobae	Berrotaran	172	440	1	440		45	3.85556	5.42222	102.273	0.711067	1005	15.5
O. cordobae	Berrotaran	173	400	1	400		41	4.4	5.13333	102.5	0.857143	1005	15.5
O. cordobae	Berrotaran	174	440	1	440		48	3.94444	5.16667	109.091	0.76344	955	15.5
O. cordobae	Berrotaran	175	420	1	420		46.6667	3.75556	5.1	111.111	0.736384	1005	15.5
O. cordobae	Berrotaran	176	440	1	440		46.6667	3.88889	5.26667	106.061	0.738396	955	15.5
O. cordobae	Berrotaran	177	420	1	420		47	3.83333	5.06667	111.905	0.756578	1005	15.5
O. cordobae	Berrotaran	178	480	1	480		51	3.8	5.37778	106.25	0.706611	955	15.5
O. cordobae	Berrotaran	179	460	1	460		45.6667	4.07778	5.74444	99.2754	0.709866	854	15.5
O. cordobae	Berrotaran	180	500	1	500		54.3333	4.07778	5.2	108.667	0.784188	955	15.5
O. cordobae	Berrotaran	181	446.667	1	446.667		43.6667	4.22222	5.57778	97.7612	0.756971	904	15.5
O. cordobae	Berrotaran	182	406.667	1	406.667		45	4.03333	4.78889	110.656	0.842226	1005	15.5
O. cordobae	Berrotaran	183	460	1	460		49	3.93333	5.35556	106.522	0.734439	955	15.5
O. cordobae	Canada del Sauce	54	413.333	1	413.333		49.6667	2.84444	5.54444	120.161	0.513026	1105	22
O. cordobae	Canada del Sauce	55	378	1	378		50.3333	2.7	4.87778	133.157	0.55353	1155	22
O. cordobae	Canada del Sauce	56	440	1	440		53.6667	3.06667	5.07778	121.97	0.603939	1105	22
O. cordobae	Canada del Sauce	57	426.167	1	426.167		52.6667	2.90556	5.24444	123.582	0.554027	1013	24
O. cordobae	Canada del Sauce	58	493.333	1	493.333		59.3333	3.63333	4.68889	120.27	0.774881	1055	20
O. cordobae	Canada del Sauce	59	400	1	400		51	3.68889	4.06667	127.5	0.907103	1105	20
O. cordobae	Rio de los sauces	197	580	1	580		53.3333	4.75556	5.78889	91.954	0.821498	1005	14.8
O. cordobae	Rio de los sauces	198	546.667	1	546.667		49.3333	3.44444	7.45556	90.2438	0.461996	955	14.8
O. cordobae	Rio de los sauces	199	620	1	620		58	3.45556	7.26667	93.5484	0.475536	854	14.8
O. cordobae	Rio de los sauces	200	680	1	680		62	3.63333	6.5	91.1765	0.558974	955	14.8
O. cordobae	Rio de los sauces	201	560	1	560		57	2.6	7.01111	101.786	0.37084	1055	17.3
O. cordobae	Rio de los sauces	202	500	1	500		51.3333	3.28889	6.36667	102.667	0.516579	1055	17.3
O. cordobae	Rio de los sauces	203	560	1	560		58	3.62222	6.57778	103.571	0.550675	955	17.3
O. cordobae	Rio de los sauces	204	546.667	1	546.667		56.3333	3.43333	6.38889	103.049	0.537391	955	17.3
O. cordobae	Rio de los sauces	205	580	1	580		57.3333	4.45556	5.46667	98.8505	0.815041	905	17.3
O. cordobae	Rio de los sauces	206	600	1	600		60	4.1	5.94444	100	0.68972	955	17.3
O. cordobae	Rio de los sauces	207	600	1	600		59.6667	4.18889	5.73333	99.4445	0.730621	1005	17.3
O. cordobae	Rio de los sauces	208	580	1	580		58.3333	3.12222	6.42222	100.575	0.486159	1055	17.3
O. cordobae	San Clemente	101	530	1	530		60	3.32222	5.56667	113.208	0.596806	954	20
O. cordobae	San Clemente	102	526.667	1	526.667		56.6667	3.48889	5.53333	107.595	0.630523	920.667	20
O. cordobae	San Clemente	103	466.667	1	466.667		52.6667	2.68889	6.15556	112.857	0.436823	937.333	20
O. cordobae	San Clemente	104	453.333	1	453.333		48.3333	3.37778	5.93333	106.618	0.569289	1071.67	17.5
O. cordobae	San Clemente	105	513.333	1	513.333		54	3.38889	6.06667	105.195	0.558608	1005	17.5
O. cordobae	Santa Rosa	144	466.667	1	466.667		52.3333	3.51111	5.51111	112.143	0.637097	1005	19.7
O. cordobae	Santa Rosa	184	500	1	500		48.6667	4.56667	5.66667	97.3334	0.805882	1038.33	19.5
O. cordobae	Santa Rosa	185	493.333	1	493.333		49.3333	5.06667	4.7	100	1.07801	938.333	19.5
O. cordobae	Santa Rosa	186	426.667	1	426.667		44.6667	5.16667	4.03333	104.687	1.28099	854	19.5
O. cordobae	Santa Rosa	187	520	1	520		49.6667	4.64444	5.83333	95.5129	0.79619	1055	19.5
O. cordobae	Santa Rosa	188	546.667	1	546.667		56	3.96667	5.62222	102.439	0.705534	1155	18.7
O. cordobae	Santa Rosa	189	500	1	500		51	4.86667	4.85556	102	1.00229	1005	18.7
O. cordobae	Santa Rosa	190	493.333	1	493.333		50.3333	3.22222	6.38889	102.027	0.504347	1105	18.7
O. cordobae	Santa Rosa	191	480	1	480		51.3333	4.05556	5.18889	106.944	0.781585	1055	18.7
O. cordobae	Santa Rosa	192	500	1	500		50	3.38889	6.34444	100	0.534151	955	18.7
O. cordobae	Santa Rosa	193	446.667	1	446.667		47	3.98889	5.47778	105.224	0.728195	1005	18.7
O. cordobae	Santa Rosa	194	526.667	1	526.667		52.6667	3.73333	6.11111	100	0.610909	1005	18.7
O. cordobae	Santa Rosa	195	453.333	1	453.333		47	3.66667	5.92222	103.677	0.619138	1021.67	18.7
O. cordobae	Santa Rosa	196	506.667	1	506.667		50.3333	3.87778	5.85556	99.342	0.662239	1005	18.7
O. cordobae	Tanti	106	420	1	420		50.3333	3.18889	4.95556	119.841	0.643497	1055	20
O. cordobae	Tanti	107	433.333	1	433.333		53.6667	2.51111	5.31111	123.846	0.472803	1155	20
O. cordobae	Villa General Belgrano	63	538.333	1	538.333		53.6667	3.45556	6.46667	99.6905	0.534365	1105	18
O. cordobae	Villa General Belgrano	64	493.333	1	493.333		41.3333	4.73333	6.92222	83.7838	0.683788	921.333	15
O. cordobae	Villa General Belgrano	65	573.333	1	573.333		45.6667	4.05556	8.2	79.6513	0.49458	955	15
O. cordobae	Villa General Belgrano	66	660	1	660		51.3333	3.35556	9.3	77.7777	0.360813	1005	15
O. cordobae	Villa General Belgrano	67	540	1	540		45	3.27778	8.56667	83.3333	0.38262	1030	15
O. cordobae	Villa General Belgrano	68	580	1	580		48	3.8	8.22222	82.7586	0.462162	904	15
O. cordobae	Villa General Belgrano	69	493.333	1	493.333		41.3333	3.8	8.01111	83.7838	0.474341	930	15
O. cordobae	Villa General Belgrano	70	573.333	1	573.333		45.3333	4.67778	8.01111	79.0698	0.583912	955	15
O. cordobae	Villa General Belgrano	71	640	1	640		50	3.41111	9.24444	78.125	0.36899	971.667	15
O. cordobae	Villa General Belgrano	72	486.667	1	486.667		40.3333	3.94444	7.76667	82.8766	0.507868	938.333	15
O. cordobae	Villa General Belgrano	73	520	1	520		43.3333	4.51111	7.33333	83.3333	0.615152	955	15
O. cordobae	Villa General Belgrano	74	600	1	600		47	4.38889	8.33333	78.3333	0.526667	913.333	15
O. cordobae	Villa General Belgrano	75	680	1	680		54.6667	4.45556	7.9	80.3922	0.563995	905	15
O. cordobae	Villa General Belgrano	76	626.667	1	626.667		49.6667	4.53333	8.12222	79.2553	0.558139	896.333	15
O. cordobae	Villa General Belgrano	77	592	1	592		47.3333	4.64444	7.93333	79.9549	0.585434	896.333	15
O. cordobae	Villa General Belgrano	78	736.667	1	736.667		60	4.74444	7.53333	81.4479	0.629793	905	15
O. cordobae	Villa General Belgrano	79	553.333	1	553.333		45.3333	3.66667	8.5	81.9277	0.431373	988.333	15.5
O. cordobae	Villa General Belgrano	80	693.333	1	693.333		63.6667	3.23333	7.46667	91.827	0.433035	1038.33	15.5
O. cordobae	Villa General Belgrano	81	446.667	1	446.667		40.3333	4.03333	6.72222	90.2984	0.6	887.667	15.5
O. cordobae	Villa General Belgrano	82	726.667	1	726.667		68.3333	3.26667	7.3	94.0366	0.447489	970	15.5
O. cordobae	Villa General Belgrano	83	506.667	1	506.667		46.6667	4.02222	6.8	92.1053	0.591503	955	15.5
O. cordobae	Villa General Belgrano	84	593.333	1	593.333		47.6667	3.72222	8.51111	80.3372	0.437337	1005	15.5
O. cordobae	Villa General Belgrano	85	366.667	1	366.667		41.3333	4.61111	4.25556	112.727	1.08355	921.667	19
O. cordobae	Villa General Belgrano	86	480	1	480		50.6667	4.15556	4.61111	105.556	0.901206	1055	19
O. cordobae	Villa General Belgrano	87	366.667	1	366.667		39	3.87778	5.51111	106.364	0.70363	980	19
O. cordobae	Villa General Belgrano	88	320	1	320		34.3333	4.18889	5.28889	107.292	0.792017	955	19
O. cordobae	Villa General Belgrano	89	480	1	480		47.3333	4.68889	5.56667	98.611	0.842315	930	18
O. cordobae	Villa General Belgrano	90	473.333	1	473.333		49	4.01111	5.67778	103.521	0.706457	1030	18
O. cordobae	Villa General Belgrano	91	480	1	480		47	4.52222	5.77778	97.9167	0.782692	854	18
O. cordobae	Villa General Belgrano	92	600	1	600		62	4.88889	4.73333	103.333	1.03286	913.333	18
O. cordobae	Villa General Belgrano	93	506.667	1	506.667		50.6667	4.27778	5.8	100	0.737548	904.667	18
O. cordobae	Villa General Belgrano	94	480	1	480		47	3.11111	7.25556	97.9167	0.42879	955	17.5
O. cordobae	Villa General Belgrano	95	531.667	1	531.667		51	3.64444	6.71111	95.9247	0.543046	955	17.5
O. cordobae	Villa General Belgrano	96	600	1	600		57.6667	3.38889	7.01111	96.1112	0.48336	954.333	17.5
O. cordobae	Villa General Belgrano	97	580	1	580		57.6667	3.02222	7.02222	99.4253	0.43038	1105	17.5
O. cordobae	Villa General Belgrano	98	540	1	540		51	4.01111	6.45556	94.4444	0.621342	955	17.5
O. cordobae	Villa General Belgrano	99	420	1	420		54	3.02222	4.78889	128.571	0.63109	955	19.5
O. cordobae	Villa General Belgrano	100	386.667	1	386.667		50.3333	3.37778	4.36667	130.172	0.773537	1005	19.5
O. cordobae	Villa General Belgrano	145	320	1	320		39.3333	3.46667	4.64444	122.917	0.746413	955	22.4
O. cordobae	Villa General Belgrano	146	333.333	1	333.333		40.6667	3.54444	4.55556	122	0.778047	905	22.4
O. cordobae	Villa General Belgrano	147	520	1	520		58	3.14444	5.76667	111.538	0.545278	1005	22.4
O. cordobae	Villa General Belgrano	148	420	1	420		56.3333	3.24444	4.06667	134.127	0.797812	955	22.4
O. cordobae	Villa General Belgrano	149	340	1	340		40.6667	3.53333	4.78889	119.608	0.737818	955	22.4
O. cordobae	Villa General Belgrano	150	340	1	340		41.6667	3.23333	4.86667	122.549	0.664382	955	22.4
O. lavillai	Villa La Punta	127	340.667	1	340.667		45.3333	4.9	2.53333	133.072	1.93421	754	24.3
O. lavillai	Villa La Punta	128	340	1	340		43.3333	4.89	2.8	127.451	1.74643	754	24.3
O. lavillai	Villa La Punta	129	311	1	311		38.3333	4.8125	3.1375	123.258	1.53386	804	24.3
O. lavillai	Villa La Punta	130	366.667	1	366.667		46.6667	4.81111	2.83333	127.273	1.69804	804	24.3
O. lavillai	Villa La Punta	131	320	1	320		40.3333	4.18889	3.75556	126.042	1.11538	754	24.3
O. lavillai	Villa La Punta	132	293.333	1	293.333		37.6667	4.32222	3.18889	128.409	1.3554	787.333	24.3
O. lavillai	Villa La Punta	133	340	1	340		43.3333	4.84444	3.18889	127.451	1.51916	854	24.3
O. lavillai	Villa La Punta	134	333.333	1	333.333		41.6667	4.03333	3.74444	125	1.07715	704	24.3
O. lavillai	Villa La Punta	135	380	1	380		45.3333	4.76667	3.16667	119.298	1.50526	804	24.3
O. lavillai	Villa La Punta	136	366.667	1	366.667		44.3333	4.45556	3.55556	120.909	1.25312	854	24.3
O. lavillai	Villa La Punta	137	400	1	400		48.6667	4.07778	3.88889	121.667	1.04857	804	24.3
O. lavillai	Villa La Punta	138	373.333	1	373.333		46	4.35556	3.88889	123.214	1.12	754	24.3
O. lavillai	Villa La Punta	139	346.667	1	346.667		41.3333	4.81111	3.08889	119.231	1.55755	905	24.3
O. lavillai	Villa La Punta	140	393.333	1	393.333		49.6667	3.91111	4.04444	126.271	0.967034	754	24.3
O. lavillai	Villa La Punta	141	366.667	1	366.667		44.3333	4.51111	3.71111	120.909	1.21557	787.333	24.3
O. lavillai	Villa La Punta	142	393.333	1	393.333		47.6667	4.62222	3.44444	121.187	1.34194	804	24.2
O. lavillai	Villa La Punta	143	313.333	1	313.333		39	4.94444	2.96667	124.468	1.66666	854	24.2
O. occidentalis	Achiras	305	12050.9	84	88.8667	55.0444	6	10.5667	3.67778	41.8226	2.87312	770.667	17.5
O. occidentalis	Achiras	306	9087.3	63.6667	82.5111	59	6	10.2333	3.77778	42.0367	2.70881	854	17.5
O. occidentalis	Alpa Corral	298	4974.23	32.6667	91.4444	61.2778	6.33333	9.57778	5.2	41.5922	1.84188	754	14.6
O. occidentalis	Las Albahacas	108	3662.67	21.3333	110	63.7778	7.77778	5.05556	9.77778	45.3018	0.517046	854	17.5
O. occidentalis	Las Albahacas	109	4140	25.3333	105.778	57	7.55556	5.88889	8.72222	46.2336	0.67516	852	17.5
O. occidentalis	Las Albahacas	110	2395.33	17	88.6667	53.7778	7.66667	6.5	6.92222	54.4115	0.939005	854	18.5
O. occidentalis	Las Albahacas	111	2742.67	19.6667	90.6667	55.2222	7.77778	4.77778	8.56667	55.7717	0.557717	854	18.5
O. occidentalis	Las Albahacas	299	3001.77	19.3333	96.5889	58	6.88889	7.9	5.46667	44.3688	1.44512	854	17.2
O. occidentalis	Las Albahacas	300	2142.47	15	90.7444	55.5	6.66667	8.06667	5.36667	46.6751	1.50311	820.667	17.2
O. occidentalis	Las Albahacas	301	1609.57	11.6667	86.4889	56.0444	6.66667	8.16667	4.72222	48.3222	1.72941	904	17.2
O. occidentalis	Las Albahacas	302	1535	10.3333	94.5556	57.2667	7.11111	8.1	5.68889	47.8705	1.42383	820.667	17.2
O. occidentalis	Las Albahacas	303	1791.8	13	91.2556	50.1556	6.55556	9.38889	3.95556	47.5624	2.37359	754	17.2
O. occidentalis	Las Albahacas	304	4069.43	29	95.0556	48.8667	6.88889	10.2	3.96667	49.0923	2.57143	804	17.2
O. occidentalis	San Clemente	114	2343	15.6667	98.2222	57.6667	7	5.58889	9.36667	46.8062	0.596678	804	16.5
O. occidentalis	San Clemente	115	3164.67	22	88	57.2222	6.33333	4.88889	9.68889	44.0277	0.504587	770	16.5
O. occidentalis	San Clemente	116	3352.67	22	94.5556	64.3333	6.55556	5.2	8.73333	43.0172	0.59542	804	16.5
O. occidentalis	San Clemente	117	6927.33	41.3333	106.222	61.5556	7	5.82222	9.17778	41.7669	0.634382	804	16.5
O. occidentalis	San Clemente	118	8196.33	58.6667	78.1111	62.1111	6	4.58889	9.08889	42.9461	0.50489	871.333	21
O. occidentalis	San Clemente	119	2436.33	21.3333	70.4444	47.3333	6	4.6	7.85556	52.538	0.585573	720	21
O. occidentalis	Villa General Belgrano	112	4313.33	19.6667	134.889	74.6667	7.66667	8.02222	10.7	34.9563	0.74974	804	14.5
O. occidentalis	Villa General Belgrano	113	8888.67	63.6667	88.8889	49.6667	6	5.83333	8.9	42.9761	0.65543	804	18
O. achalensis	Pampa de Achala	120	9246.2	51.4	116	64.5333	6.2	9.53333	9.63333	34.4661	0.989619	854
O. achalensis	Pampa de Achala	121	1587.33	8.33333	123.222	84.8889	6.55556	6.42222	12.4222	34.4161	0.516995	820.667	14
O. achalensis	Pampa de Achala	122	20083	111	104.333	75.8889	6.66667	7.07778	9.77778	36.8471	0.723864	770	14.4
O. achalensis	Pampa de Achala	123	6750.33	36.6667	107.667	78.6667	6.11111	7.35556	11.1111	33.1946	0.662001	754	15.5
O. achalensis	Pampa de Achala	124	8850.67	41.6667	127.778	75	6.88889	7.86667	11.2111	32.4311	0.701686	754	15.5
O. achalensis	Pampa de Achala	125	11311	62.6667	114.556	64.6667	6.88889	8.63333	9.03333	38.1667	0.95572	754	17
O. achalensis	Pampa de Achala	126	6557	35	116.333	71.6667	7	8.33333	8.71111	37.3646	0.956632	754	17
O. achalensis	Pampa de Achala	250	8100.03	66	81.0556	44.6444	6.33333	5.77778	8	51.6047	0.722222	753.533	21.3
O. achalensis	Pampa de Achala	251	5570.83	45	70.8667	54.3556	5.88889	5.31111	7.12222	47.5692	0.74571	854.3	21.3
O. achalensis	Pampa de Achala	252	7009.73	54.6667	83.9556	44.8444	6.55556	7.93333	4.43333	51.1248	1.78947	804	21.3
O. achalensis	Pampa de Achala	253	14879.1	120	71.9333	56.0778	5.44444	6.18889	6.44444	43.9094	0.960346	804	21.3
O. achalensis	Pampa de Achala	254	3131.4	23.3333	82.5556	51.7778	5.88889	6.67778	7.03333	43.8804	0.949448	820.667	21.3
O. cf. Achalensis	Carolina	266	11925.7	59.6667	116.333	90.3333	6.44444	4.62222	14.9444	32.2428	0.309294	770	13.5
O. cf. Achalensis	Carolina	267	11394.5	57	112.289	87.0556	5.33333	11.0222	8.45556	26.6795	1.30354	787	13.5
O. cf. Achalensis	Carolina	268	12706.7	87.3333	97.4333	50.9778	7	7.13333	6.35556	48.1111	1.12238	854	16.8
O. cf. Achalensis	Carolina	269	7656.4	50.6667	96.6	52.8	7.33333	10.0556	3.25556	48.5288	3.08875	854	16.8
O. cf. Achalensis	Carolina	270	19308.6	137	96.6556	47.2111	7.33333	8.95556	4.13333	52.0321	2.16667	804	16
O. cf. Achalensis	Carolina	271	5095.13	39.6667	79.4	52.5444	6.11111	6.94444	5.94444	47.5763	1.16822	804	17.5
O. cf. Achalensis	Carolina	272	2688.37	21.3333	78.1111	53.8222	6	6.57778	6.88889	47.6124	0.954839	854	17.5
O. cf. Achalensis	Carolina	273	1042.8	8.33333	83.9	48.3667	6.44444	6.91111	5.46667	51.4995	1.26423	955	17.5
O. cf. Achalensis	Carolina	274	2185.6	16.6667	82.3444	49.9778	6.88889	6.38889	6.11111	52.5325	1.04545	905	17.5
O. cf. Achalensis	Carolina	275	3298.1	23.3333	88.3889	59.7667	6.66667	6.85556	6.95556	47.1652	0.985623	754	17.5
O. barrioi	Aguadita	255	3377.6	20.6667	100.644	66.2333	7.77778	7.91111	5.95556	47.5903	1.32836	603	16.8
O. barrioi	Aguadita	256	3342.73	20.3333	109.856	56.7889	7.66667	7.27778	6.86667	46.6351	1.05987	603	16.8
O. barrioi	Aguadita	257	1303.27	8.66667	94	62.3333	7.77778	7.74444	5.38889	51.7218	1.43711	553	16.8
O. barrioi	Aguadita	258	1546.1	10.3333	96.8778	64.8	7.66667	7.31111	5.68889	51.2399	1.28516	553	16.8
O. barrioi	Aguadita	259	1405.9	9.33333	91.8111	65.8556	7.66667	6.91111	5.32222	50.8966	1.29854	653.667	16.8
O. barrioi	Aguadita	260	1501.4	9.33333	91.1444	72.9556	7.55556	7.83333	5.33333	46.9685	1.46875	653	16.8
O. barrioi	Aguadita	261	1005.97	7	95.1556	56.7556	7.55556	7.03333	6.05556	52.575	1.16147	553	18.1
O. barrioi	Aguadita	262	1591.83	10	98.5444	66.4	7.88889	7.16667	5.92222	49.5586	1.21013	704	18.1
O. barrioi	Aguadita	263	1474.33	9.66667	99.3333	57.3778	7.55556	6.5	6.34444	49.5392	1.02452	653	18.1
O. barrioi	Aguadita	264	4465.6	27.6667	98.2889	64.2667	7.44444	6.26667	7.1	46.1222	0.88263	653	15.1
O. barrioi	Aguadita	265	2438.67	15.3333	108.056	53.1333	8.11111	7.62222	5.77778	50.9991	1.31923	603	15.1
O. cf. Barrioi	Pié de Palo	276	1284.43	8.33333	108.733	49.5	8.88889	8.55556	3.74444	57.6708	2.28487	653	20
O. cf. Barrioi	Pié de Palo	277	1549.73	10	106.844	50.3889	8.44444	7.75556	5.08889	54.4897	1.52402	704	20
O. cf. Barrioi	Pié de Palo	278	1291.43	8	113.833	55.9222	8.66667	8.76667	4.43333	53.6873	1.97745	653	20
O. cf. Barrioi	Pié de Palo	279	2672.73	16.6667	102.856	55.0111	8.22222	8.28889	4.45556	51.2724	1.86035	653	20
O. cf. Barrioi	Pié de Palo	280	1048.17	7	106.256	51.1889	8.55556	7.84444	4.52222	57.1366	1.73464	703	20
O. cf. Barrioi	Pié de Palo	281	10161.7	65.3333	102.744	53.7222	8	9.27778	3.17778	51.4349	2.91958	754	20
O. cf. Barrioi	Pié de Palo	282	1924.6	12.3333	103.6	55.3556	8.11111	8.93333	3.78889	51.9779	2.35777	737	20
O. cf. Barrioi	Pié de Palo	283	1430.43	10	97.6333	49.7667	8	7.83333	3.98889	55.9272	1.96379	703	20
O. cf. Barrioi	Pié de Palo	284	1872.87	13.3333	98.5	50.8444	8.11111	7.88889	3.68889	57.7445	2.13855	703	20
O. cf. Barrioi	Pié de Palo	285	1534.23	8.66667	123.622	59.8444	9	8	5.67778	50.8399	1.409	653	20
O. cf. Barrioi	Pié de Palo	286	1325.6	7.66667	119.022	65.5444	8.88889	9.32222	4.23333	51.4093	2.2021	704	20
O. cf. Barrioi	Pié de Palo	287	1504.37	10.3333	103.944	49.2444	8.55556	9.06667	3.52222	58.7669	2.57414	653	18.1
O. cf. Barrioi	Pié de Palo	288	1562.5	10	104	58.2667	8.11111	9.31111	3.88889	51.9111	2.39428	603	18.1
O. cf. Barrioi	Pié de Palo	289	2899.43	18.3333	99.4111	60.9889	8	9.32222	3.24444	50.5846	2.87329	653	18.1
O. cf. Barrioi	Pié de Palo	290	2704.57	17.6667	103.056	54.5444	8	9.53333	3.24444	52.2573	2.93836	653	18.1
O. cf. Barrioi	Pié de Palo	291	1281.33	10	75.8778	65.1	6.55556	7.93333	3.37778	51.1622	2.34868	703	20.8
O. cf. Barrioi	Pié de Palo	292	1314.63	8.66667	97.2	57.4556	8	8.57778	4.17778	52.7398	2.05319	703	20.8
O. cf. Barrioi	Pié de Palo	293	895.8	5.66667	98.9444	72.1444	7.88889	9.21111	3.62222	49.9037	2.54295	603	20.8
O. cf. Barrioi	Pié de Palo	294	1057	7	92.4333	66.3667	7.33333	9.58889	3.47778	48.5651	2.75719	653	20.8
O. cf. Barrioi	Pié de Palo	295	4567.73	29.6667	97.3222	58.3667	7.66667	9.15556	3.27778	49.7938	2.79322	704	20.8
O. cf. Barrioi	Pié de Palo	296	2472.53	15.3333	101.333	62.3333	8.33333	6.92222	5.8	51.6788	1.19349	653	20.8
O. cf. Barrioi	Pié de Palo	297	1205.27	8	101.511	56.6667	8.44444	7.88889	4.41111	56.0501	1.78841	653	20.8
